# Supplementary material for: Targeted ablation of signal transducer and activator of transduction 1 alleviates inflammation by microglia/macrophages and promotes long-term recovery after ischemic stroke
Source: PubMed Central journal article supplement (PMC10385956; doi:10.1186/s12974-023-02860-4), 2023-07-29
Supplement: 12974_2023_2860_MOESM1_ESM.pdf [file 12974_2023_2860_MOESM1_ESM.pdf]

**Table S1. Key resources**

| <b>REAGENT or RESOURCE</b>                               | <b>SOURCE</b>            | <b>IDENTIFIER</b> |
|----------------------------------------------------------|--------------------------|-------------------|
| <b>Antibodies</b>                                        |                          |                   |
| BUV395 Rat Anti-Mouse Ly-6G, Clone 1A8                   | BD Biosciences           | 563978            |
| BUV737 Rat Anti-CD11b Clone M1/70                        | BD Biosciences           | 612800            |
| CD45 Monoclonal Antibody (30-F11), PerCP-Cyanine5.5      | eBioscience              | 45-0451-82        |
| O4 Alexa Fluor 488-conjugated Antibody                   | R&D Systems              | FAB1326G          |
| APC-conjugated GLAST (ACSA-1) Antibody                   | Miltenyi Biotec          | 130-123-555       |
| PE Mouse anti-Total Stat1 (N-Terminus)                   | BD Biosciences           | 558537            |
| PE-conjugated GLAST (ACSA-1) Antibody                    | Miltenyi Biotec          | 130-118-344       |
| Alexa Fluor 647 Mouse Anti-Stat1 (pY701)                 | BD Biosciences           | 612597            |
| Rabbit anti-Iba1                                         | Wako                     | 019-19741         |
| Rabbit polyclonal anti-MAP2                              | Millipore                | AB5622-I          |
| Rabbit polyclonal anti-NeuN                              | Millipore                | ABN78             |
| Rabbit polyclonal anti-HMGB1                             | Invitrogen               | PA1-16926         |
| Mouse Anti-NeuN Antibody, clone A60                      | Millipore                | MAB377            |
| Goat polyclonal anti-Iba1 antibody                       | abcam                    | ab5076            |
| CD45 Monoclonal Antibody (30-F11), eFlour 450            | eBioscience              | 48-0451-82        |
| CD11b Monoclonal Antibody (M1/70), APC-eFlour 780        | eBioscience              | 47-0112-82        |
| BUV395 Rat Anti-Mouse Ly-6G, Clone 1A8                   | BD Biosciences           | 563978            |
| CD11c Monoclonal Antibody (N418), PerCP-Cyanine5.5       | eBioscience              | 45-0114-82        |
| BUV737 Rat Anti-Mouse CD16/CD32 Clone 2.4G2              | BD Biosciences           | 612783            |
| TNF alpha Monoclonal Antibody (MP6-XT22), APC            | eBioscience              | 17-7321-82        |
| PE/Cyanine5 anti-mouse CD86 Antibody                     | BioLegend                | 105016            |
| Brilliant Violet 605 anti-mouse CD206 (MMR) Antibody     | BioLegend                | 141721            |
| Human/Mouse Arginase 1/ARG1 PE-conjugated Antibody       | R&D Systems              | IC5868P           |
| BV421 Rat Anti-Mouse IL-10 Clone JES5-16E3               | BD Biosciences           | 563276            |
| Rat Anti-Mouse CD16/CD32 (Mouse BD Fc Block) Clone 2.4G2 | BD Biosciences           | 553142            |
| Anti-arginase I Antibody (N-20)                          | Santa Cruz Biotechnology | sc-18351          |
| BUV737 Rat Anti-Mouse CD19, Clone 1D3                    | BD Biosciences           | 612781            |
| CD3 Monoclonal Antibody (17A2), APC                      | eBioscience              | 17-0032-82        |

|                                                                                     |                           |                           |
|-------------------------------------------------------------------------------------|---------------------------|---------------------------|
| F4/80 Monoclonal Antibody (BM8), PE                                                 | eBioscience               | 12-4801-82                |
| Anti-Caspr Antibody, clone K65/35                                                   | Millipore                 | MABN69                    |
| Rabbit anti-Nav1.6 (SCN8A)                                                          | Alomone Labs              | ASC-009                   |
| <b>Chemicals, Peptides, and Recombinant Proteins</b>                                |                           |                           |
| Tamoxifen                                                                           | Sigma-Aldrich             | T5648                     |
| <b>Critical Commercial Assays</b>                                                   |                           |                           |
| Mouse Inflammation Array C1                                                         | RayBiotech                | AAM-INF-1                 |
| M.O.M. (Mouse on Mouse) Immunodetection Kit, Basic                                  | Vector Laboratories       | BMK-2202                  |
| <i>In Situ</i> Cell Death Detection Kit, TMR red                                    | Roche                     | 12156792910               |
| Neural Tissue Dissociation Kit (T)                                                  | Miltenyi Biotec           | 130-093-231               |
| OneComp eBeads Compensation Beads                                                   | ThermoFisher              | 01-1111-42                |
| Zombie NIR Fixable Viability Kit                                                    | BioLegend                 | 423105                    |
| eBioscience Foxp3/Transcription Factor Staining Buffer Set                          | Thermo Fisher             | 00-5523-00                |
| Cell Lysis Buffer                                                                   | Cell Signaling Technology | 9803                      |
| Halt Protease and Phosphatase Inhibitor Cocktail                                    | ThermoFisher              | 78842                     |
| RNeasy Plus Micro Kit                                                               | Qiagen                    | 74034                     |
| RT2 First Strand Kit                                                                | Qiagen                    | 330401                    |
| RT2 SYBR Green qPCR Mastermix                                                       | Qiagen                    | 330502                    |
| SMART-Seq HT Kit                                                                    | Takara Bio                | 634456                    |
| Nextera XT DNA Library Prep Kit Reference Guide                                     | Illumina                  | 15031942                  |
| <b>Experimental Models: Organisms/Strains</b>                                       |                           |                           |
| Mouse: C57BL/6J                                                                     | The Jackson Laboratory    | Stock No: 000664          |
| Mouse: B6;129S- <i>Stat1<sup>tm1Mam</sup></i> /Mmjax                                | The Jackson Laboratory    | MMRRC Stock No: 32054-JAX |
| Mouse: B6.129P2(Cg)- <i>Cx3cr1<sup>tm2.1(cre/ERT2)Lit</sup></i> /WganJ              | The Jackson Laboratory    | Stock No: 021160          |
| <b>Oligonucleotides</b>                                                             |                           |                           |
| Genotyping primer: Cx3cr1 <sup>CreER</sup> common GAA CTA CAA TCC TTT AAG GCT CAC G | Ref. [1]                  | N/A                       |
| Genotyping primer: Cx3cr1 <sup>CreER</sup> wild type GCA GGA CCT CGG GGT AGT CAC    | Ref. [1]                  | N/A                       |
| Genotyping primer: Cx3cr1 <sup>CreER</sup> mutant CAC CAG AGA CGG AAA TCC ATC G     | Ref. [1]                  | N/A                       |
| Genotyping primer: Stat1 <sup>tm1Mam</sup> GCA TGA CAT GAT CAG CAT TGC              | The Jackson Laboratory    | N/A                       |
| Genotyping primer: Stat1 <sup>tm1Mam</sup> ACT GAC GTC AAC CAA GCC TG               | The Jackson Laboratory    | N/A                       |
| qPCR primer: Stat1 forward TCA CAG TGG TTC GAG CTT CAG                              | Ref. [2]                  | N/A                       |
| qPCR primer: Stat1 reverse GCA AAC GAG ACA TCA TAG GCA                              | Ref. [2]                  | N/A                       |

|                                                          |                                 |                                                                                                                                   |
|----------------------------------------------------------|---------------------------------|-----------------------------------------------------------------------------------------------------------------------------------|
| qPCR primer: Gapdh forward GTG AAG GTC GGT<br>GTG AAC GG | Ref. [3]                        | N/A                                                                                                                               |
| qPCR primer: Gapdh reverse GTT TCC CGT TGA<br>TGA CCA G  | Ref. [3]                        | N/A                                                                                                                               |
| <b>Deposited Data</b>                                    |                                 |                                                                                                                                   |
| Raw data files for RNA-seq                               | NCBI Gene Expression<br>Omnibus | GSE141972<br>GSE234865                                                                                                            |
| <b>Software and Algorithms</b>                           |                                 |                                                                                                                                   |
| FlowJo                                                   | FlowJo, LLC                     | N/A                                                                                                                               |
| ImageJ                                                   | NIH                             | N/A                                                                                                                               |
| Imaris 9.6                                               | Bitplane                        | N/A                                                                                                                               |
| Chipster v3.15                                           | ref. [4]                        | <a href="https://chipster.csc.fi/">https://chipster.csc.fi/</a>                                                                   |
| FastQC                                                   | ref. [5]                        | <a href="http://www.bioinformatics.babraham.ac.uk/projects/fastqc/">http://www.bioinformatics.babraham.ac.uk/projects/fastqc/</a> |
| HISAT2                                                   | ref. [6]                        | <a href="https://github.com/DaehwanKimLab/hisat2">https://github.com/DaehwanKimLab/hisat2</a>                                     |
| HTSeq                                                    | ref. [7]                        | <a href="http://htseq.readthedocs.io/">http://htseq.readthedocs.io/</a>                                                           |
| R v3.5                                                   | ref. [8]                        | <a href="https://www.r-project.org/">https://www.r-project.org/</a>                                                               |
| DESeq2                                                   | ref. [9]                        | <a href="http://bioconductor.org/packages/DESeq2/">http://bioconductor.org/packages/DESeq2/</a>                                   |
| Ingenuity Pathway Analysis                               | QIAGEN                          | N/A                                                                                                                               |
| Prism 9                                                  | GraphPad                        | N/A                                                                                                                               |

## References

1. Wang R, Pu H, Ye Q, Jiang M, Chen J, Zhao J, et al. Transforming Growth Factor Beta-Activated Kinase 1-Dependent Microglial and Macrophage Responses Aggravate Long-Term Outcomes After Ischemic Stroke. *Stroke*. 2020;51(3):975-85.
2. Simova J, Pollakova V, Indrova M, Mikyskova R, Bieblova J, Stepanek I, et al. Immunotherapy augments the effect of 5-azacytidine on HPV16-associated tumours with different MHC class I-expression status. *Br J Cancer*. 2011;105(10):1533-41.
3. Ishikawa K, Yoshida S, Nakao S, Sassa Y, Asato R, Kohno R, et al. Bone marrow-derived monocyte lineage cells recruited by MIP-1beta promote physiological revascularization in mouse model of oxygen-induced retinopathy. *Lab Invest*. 2012;92(1):91-101.
4. Kallio MA, Tuimala JT, Hupponen T, Klemela P, Gentile M, Scheinin I, et al. Chipster: user-friendly analysis software for microarray and other high-throughput data. *BMC Genomics*. 2011;12:507.
5. Andrews S. FastQC: a quality control tool for high throughput sequence data. 2010.
6. Kim D, Langmead B, Salzberg SL. HISAT: a fast spliced aligner with low memory requirements. *Nat Methods*. 2015;12(4):357-60.
7. Anders S, Pyl PT, Huber W. HTSeq--a Python framework to work with high-throughput sequencing data. *Bioinformatics*. 2015;31(2):166-9.
8. R Core Team. R: A language and environment for statistical computing. Vienna, Austria: R Foundation for Statistical Computing; 2020.
9. Love MI, Huber W, Anders S. Moderated estimation of fold change and dispersion for RNA-seq data with DESeq2. *Genome Biol*. 2014;15(12):550.
